# Supplementary material
Source: PubMed Central journal article supplement (PMC2714959)
Supplement: HJFOA5-000003-000186_1-S1.pdf [file HJFOA5-000003-000186_1-S1.pdf]

# 1 Supplementary Figures

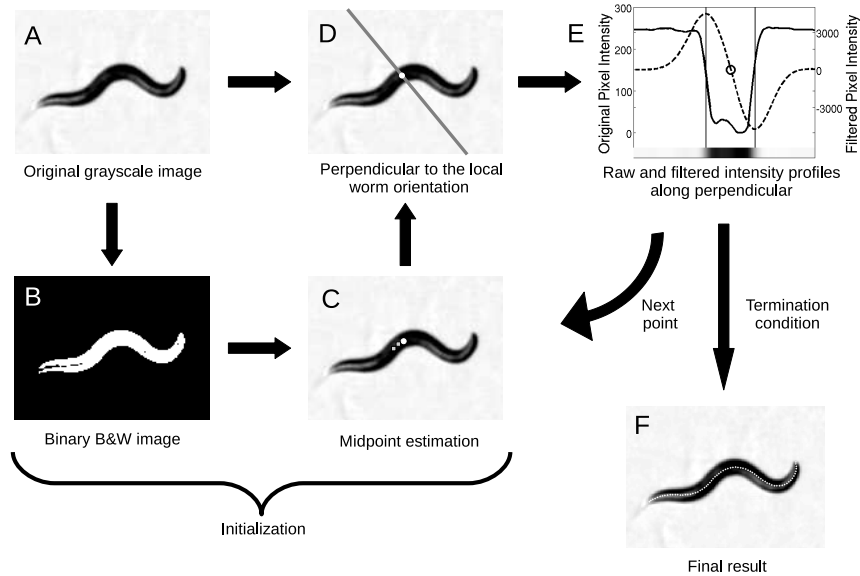

Figure 1: Schematic summary of the skeletonizer algorithm used to extract the body midline from each movie frame. a: A grey scale image. b: A rough binary image obtained by thresholding. c: During initialization, the first two midpoint estimates are obtained from the binary image (squares). The algorithm then loops through steps c-e. Further midpoints (circle) are estimated by linearly extrapolating the existing midline. d: The perpendicular to the local body shape is calculated from the grey scale image. e: The intensity profile (solid line) along the perpendicular is filtered by a derivative of a Gaussian kernel (dashed line). The peaks of the filtered signal (vertical lines) correspond to the two local body edges, and their midpoint (circle) replaces the initial estimate. The local cross-section of the worm is shown below. The process is iterated until the termination condition (crossing a lower threshold in the peak-to-peak amplitude of the filtered signal) is met.

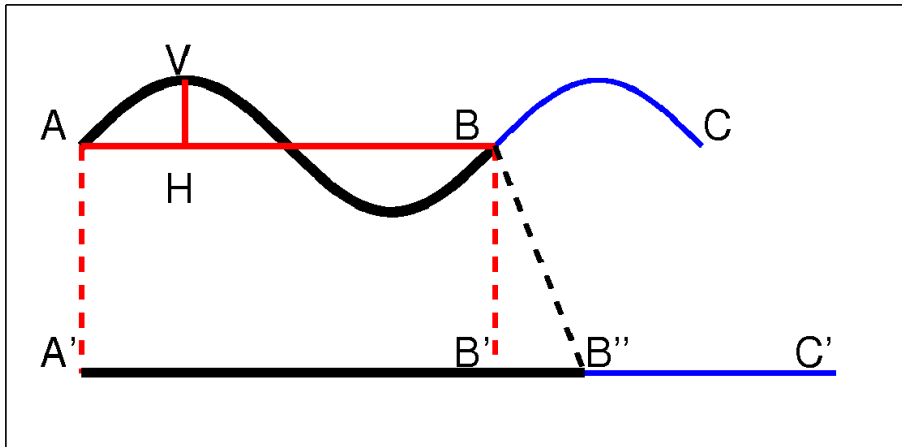

Figure 2: Algorithm for obtaining the wave amplitude and conventional wavelength. The example worm (the curve  $AC = A'C'$ ), which is a perfect sinusoid for clarity, spans 1.5 periods. The wavelength is therefore  $2/3$  body length. To calculate the conventional wavelength ( $A'B'$ ), the physiological wavelength (the black line  $AB = A'B''$ ) is used to obtain the point B along the body, and then the straight line distance (the red line  $AB$ ). In cases where wavelength exceeds the body length, the half-wavelength is obtained and doubled. The amplitude  $HV$  is the maximum distance between any point on the body midline (black curve) and that point's projection onto the red line  $AB$ . Due to the head-tail asymmetry of real waveforms, both the conventional wavelength and amplitude are calculated twice, starting from both head and tail, and then averaged.

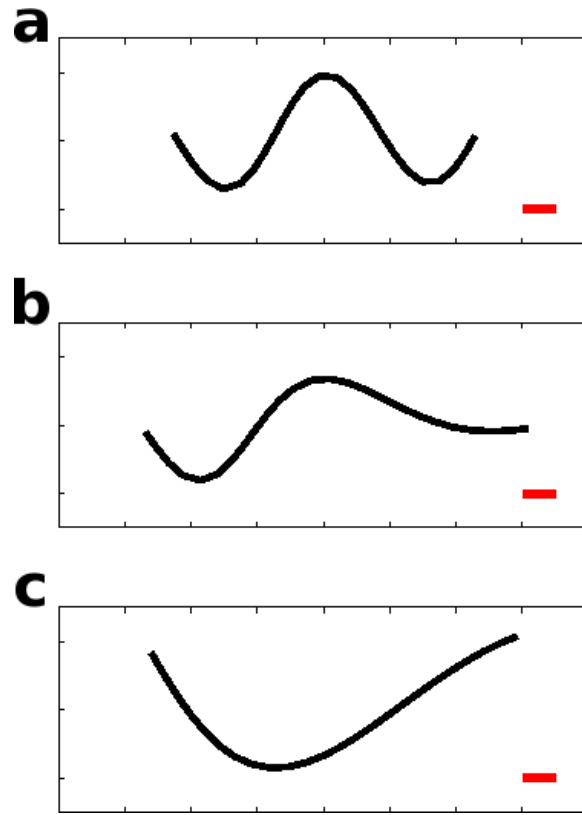

Figure 3: Examples of artificial skeletons used in comparing our simulator to the theory. a: Purely sinusoidal crawling waveform of realistic amplitude, b: more realistic crawling waveform with head-tail asymmetry ( $\lambda$  increases and  $A$  decreases towards tail) and c: swimming-like waveform where the body spans less than a full period. The scale bar is 0.1mm.

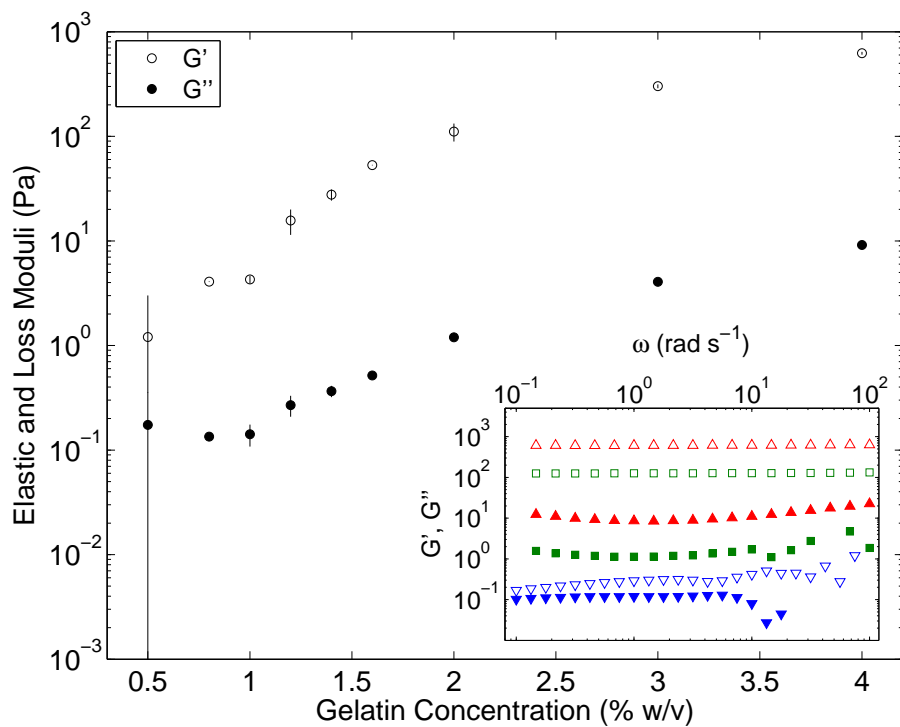

Figure 4: Elastic ( $G'$ , open symbols) and loss ( $G''$ , filled symbols) moduli (measured at 1 rad/s) vs. gelatin concentration. Error bars show standard deviations. The inset shows the frequency dependence of the moduli for three gelatin solutions at concentrations of 4% (up-triangles), 2% (squares) and 0.5% (down-triangles). The nearly frequency independent moduli for gelatin solutions of 0.8%w/v or greater is indicative of well entangled gel-networks (solid-like behaviour,  $G' > G''$ ).
